# Supplementary material for: The Choice of Search Engine Affects Sequencing Depth and HLA Class I Allele-Specific Peptide Repertoires
Source: Elsevier journal article supplement (doi:10.1016/j.mcpro.2021.100124), 2021-01-01
Supplement: mmc1 [file mmc1.pdf]

Molecular & Cellular Proteomics


Skip to Main Content

## Login to your account

Email/Username

Password

Show

Forgot password?

Remember me

Don’t have an account?

Create a Free Account

If you don't remember your password, you can reset it by entering your email address and clicking the Reset Password button. You will then receive an email that contains a secure link for resetting your password

Email\*

If the address matches a valid account an email will be sent to \_\_email\_\_ with instructions for resetting your password

Cancel

ADVERTISEMENT

SCROLL TO CONTINUE WITH CONTENT

*Close*

- Home
- Articles & Volumes
  - Back
  - Papers in Press
  - 2021 Issues
  - Current Volume
  - List of Volumes
  - Reviews & Perspectives
  - Special Issues
  - Virtual Issues
  - Editorials
- Info for
  - Back
  - Authors
  - Reviewers
  - Advertisers
  - Permission to Reuse Published Material
  - Submit Manuscript
- Guidelines
  - Back
  - Proteomic Identification
  - Clinical Proteomics
  - Glycomic Studies
  - Targeted Proteomics
  - Data-Independent Acquisition
  - Providing Access to Annotated Spectra
  - Frequently Asked Questions
- Journal Info
  - Back
  - About the Journal
  - About Open Access
  - Activate Online Access
  - Contact Information
  - Editors and Editorial Board
  - Reprints
  - New Content Alerts
- Research Articles
- Other ASBMB Publications
  - Back
  - Journal of Biological Chemistry
  - Journal of Lipid Research
  - ASBMB Today
- Submit

Go search

All ContentArticle TitleAuthorsKeywordsAbstractArticle Title, Abstract, Keywords

Advanced SearchSave search

Please enter a term before submitting your search.

 Ok

- Submit Article
- Log in
- Register
- Log in

  - Submit Article
  - Log in

- Home
- Articles & Volumes
- Papers in Press
- 2021 Issues
- Current Volume
- List of Volumes
- Reviews and Minireviews
- Special Issues
- Virtual Issues
- Editorials
- Info for
- Authors
- Reviewers
- Advertisers
- Permissions
- Submit Manuscript
- Guidelines
- Proteomic Identification
- Clinical Proteomics
- Glycomic Studies
- Targeted Proteomics
- Data-Independent Acquisition
- Providing Access to Annotated Spectra
- Frequently Asked Questions
- Contact Us
- Contact Information
- Journal Info
- About the Journal
- About Open Access
- Activate Online Access
- Editorial Board
- Reprints
- New Content Alerts
- Research Articles
- Other ASBMB Publications
- Journal of Biological Chemistry
- Journal of Lipid Research
- ASBMB Today
- Submit

ISSN 1535-9476

We use cookies to help provide and enhance our service and tailor content. To update your cookie settings, please visit the
Cookie Preference Center for this site.

Copyright © 2022 Elsevier Inc. except certain content provided by third parties. The content on this site is intended for healthcare professionals.
  
  

- Privacy Policy
- Terms and Conditions
- Accessibility
- Elsevier Help & Contact
